# Supplementary material for: Symbiodiniaceae activity enhances larval energy reserves in the mediterranean Gorgonian Eunicella singularis
Source: Springer Nature journal article supplement (doi:10.1007/s00227-025-04751-z), 2025-11-25
Supplement: MOESM1 [file 227_2025_4751_MOESM1_ESM.pdf]

# Symbiodiniaceae activity enhances larval energy reserves in the Mediterranean gorgonian *Eunicella singularis*

Federica Maggioni<sup>1,2\*</sup>, Audrey M. Pruski<sup>1</sup>, Marta Rigo<sup>1,3</sup>, Bruna Giordano<sup>1,4,5</sup>, Christine Ferrier-Pages<sup>6</sup>, Francois Lantoiné<sup>1</sup>, Federica Costantini<sup>3,4</sup>, Cécile Rottier<sup>6</sup>, Gilles Vétion<sup>1</sup>, Stéphane Hourdez<sup>1</sup>, Lorenzo Bramanti<sup>1\*</sup>

<sup>1</sup>*Sorbonne Université, CNRS, Laboratoire d'Ecogéochimie des Environnements Benthiques, LECOB, F-66650 Banyuls-sur-Mer, France*

<sup>2</sup>*ENTROPIE, IRD, Université de la Réunion, CNRS, IFREMER, Université de Nouvelle-Calédonie, Nouméa 98800, New Caledonia*

<sup>3</sup>*Dipartimento di Scienze Biologiche, Geologiche ed Ambientali (BiGeA) & Centro Interdipartimentale di Ricerca per le Scienze Ambientali (CIRSA), University of Bologna, Via S. Alberto 163, I-48123, Ravenna, Italy*

<sup>4</sup>*Consorzio Nazionale Interuniversitario per la Scienza del Mare (CoNISMa), Rome, Italy*

<sup>5</sup>*Department of Biological and Environmental Sciences and Technologies (DiSTeBA), University of Salento, Lecce*

<sup>6</sup>*Centre Scientifique de Monaco, Coral ecophysiology team, 8 Quai antoine 1er, MC-98000 Monaco*

\*Corresponding author: fedemaggio94@gmail.com & lorenzo.bramanti@obs-banyuls.fr

**Table S1.** Summary of average measurements of **A)** proximal composition, chlorophyll-a, Symbiodiniaceae abundance per larva at the beginning ( $T_0$ ) and at the end ( $T_F$ ) of larvae phase, **B)** respiration rates and photosynthesis during 3-h larvae incubations (10 larvae each batch), and **C)**  $^{13}\text{C}$  and  $^{15}\text{N}$  assimilation after 9-h larvae incubations. Data are expressed as mean  $\pm$  standard deviation of all parameters measured. The number of successfully analyzed samples is indicated in brackets (n).

## A) Proximal composition, Chlorophyll-a and Symbiodiniaceae abundance

| <b>Lipids (2019)</b>                         | <b><math>T_0</math></b> | <b><math>T_F</math></b> | <b>%change</b> |
|----------------------------------------------|-------------------------|-------------------------|----------------|
| Light ( $\mu\text{g}$ larvae <sup>-1</sup> ) | 77.24 $\pm$ 5.93 (n=4)  | 57.84 $\pm$ 6.72 (n=5)  | -25            |
| Dark ( $\mu\text{g}$ larvae <sup>-1</sup> )  | 75.75 $\pm$ 2.41 (n=5)  | 40.64 $\pm$ 2.83 (n=4)  | -46            |
| <b>Lipids (2020)</b>                         |                         |                         |                |
| Light ( $\mu\text{g}$ larvae <sup>-1</sup> ) | 57.46 $\pm$ 7.01 (n=4)  | 16.35 $\pm$ 7.15 (n=5)  | -72            |
| Dark ( $\mu\text{g}$ larvae <sup>-1</sup> )  | 47.71 $\pm$ 5.68 (n=5)  | 10.61 $\pm$ 9.87 (n=5)  | -78            |
| <b>Carbohydrates (2019)</b>                  |                         |                         |                |
| Light ( $\mu\text{g}$ larvae <sup>-1</sup> ) | 2.64 $\pm$ 0.26 (n=5)   | 4.37 $\pm$ 0.41 (n=4)   | +66            |
| Dark ( $\mu\text{g}$ larvae <sup>-1</sup> )  | 2.44 $\pm$ 0.47 (n=5)   | 2.41 $\pm$ 0.34 (n=4)   | -1             |
| <b>Proteins (2019)</b>                       |                         |                         |                |
| Light ( $\mu\text{g}$ larvae <sup>-1</sup> ) | 19.64 $\pm$ 2.43 (n=5)  | 14.50 $\pm$ 3.17 (n=5)  | -26            |
| Dark ( $\mu\text{g}$ larvae <sup>-1</sup> )  | 20.45 $\pm$ 1.36 (n=5)  | 14.76 $\pm$ 1.16 (n=4)  | -28            |
| <b>Chlorophyll a (2019)</b>                  |                         |                         |                |
| Light (ng larvae <sup>-1</sup> )             | 13.23 $\pm$ 4.76 (n=5)  | 36.15 $\pm$ 2.71 (n=5)  | +173           |
| Dark (ng larvae <sup>-1</sup> )              | 18.35 $\pm$ 3.79 (n=5)  | 7.12 $\pm$ 1.17 (n=4)   | -61            |
| <b>Chlorophyll a (2020)</b>                  |                         |                         |                |
| Light (ng larvae <sup>-1</sup> )             | 14.54 $\pm$ 7.26 (n=5)  | 14.40 $\pm$ 8.21 (n=5)  | -1             |
| Dark (ng larvae <sup>-1</sup> )              | 15.29 $\pm$ 2.22 (n=5)  | 8.15 $\pm$ 3.36 (n=4)   | -47            |

---

**Pheophytin (2019)**

|           |                 |                  |      |
|-----------|-----------------|------------------|------|
| Light (%) | 4.1 ± 0.9 (n=5) | 3.8 ± 0.1 (n=5)  | -7   |
| Dark (%)  | 7.3 ± 0.8 (n=5) | 35.8 ± 5.1 (n=4) | +390 |

---

**Pheophytin (2020)**

|           |                 |                  |      |
|-----------|-----------------|------------------|------|
| Light (%) | 8.1 ± 1.8 (n=5) | 5.6 ± 1.2 (n=5)  | -31  |
| Dark (%)  | 7.4 ± 2.2 (n=5) | 15.1 ± 1.7 (n=4) | +104 |

---

**Symbiodiniaceae (2020)**

|                                     |                 |                  |     |
|-------------------------------------|-----------------|------------------|-----|
| Light (cells larvae <sup>-1</sup> ) | 121 ± 36 (n=19) | 230 ± 138 (n=26) | +90 |
| Dark (cells larvae <sup>-1</sup> )  | 119 ± 108 (n=8) | 82 ± 65 (n=57)   | -31 |

---

**B) Respiration rates and photosynthesis**

---

**Respiration rates**

|                                                      |                   |
|------------------------------------------------------|-------------------|
| Light (μmol. min <sup>-1</sup> larva <sup>-1</sup> ) | 0.21 ± 0.11 (n=2) |
| Dark (μmol. min <sup>-1</sup> larva <sup>-1</sup> )  | 0.45 ± 0.09 (n=2) |

**Photosynthesis**

|                                                      |                   |
|------------------------------------------------------|-------------------|
| Light (μmol. min <sup>-1</sup> larva <sup>-1</sup> ) | 0.12 ± 0.08 (n=2) |
| Dark (μmol. min <sup>-1</sup> larva <sup>-1</sup> )  | 0.48 ± 0.04 (n=2) |

---

**C) <sup>13</sup>C and <sup>15</sup>N assimilation**

|                                                         | <b>C</b>          | <b>N</b>          | <b>C/N</b>         |
|---------------------------------------------------------|-------------------|-------------------|--------------------|
| Light (nmol C(N) h <sup>-1</sup> larvae <sup>-1</sup> ) | 0.15 ± 0.03 (n=3) | 0.01 ± 0.00 (n=3) | 21.45 ± 2.17 (n=3) |
| Dark (nmol C(N) h <sup>-1</sup> larvae <sup>-1</sup> )  | 0.17 ± 0.02 (n=3) | 0.01 ± 0.00 (n=3) | 20.15 ± 2.89 (n=3) |
